# Supplementary material for: The Aldehyde Dehydrogenase ALDH2*2 Allele, Associated with Alcohol Drinking Behavior, Dates Back to Prehistoric Times
Source: MDPI journal article supplement (doi:10.3390/biom11091376), 2021-09-17

# The Aldehyde Dehydrogenase ALDH2\*2 Allele, Associated with Alcohol Drinking Behavior, Dates Back to Prehistoric Times

Chih-Lang Lin <sup>1,2,3,4</sup>, Rong-Nan Chien <sup>2,3,4</sup>, Li-Wei Chen <sup>1,3,4</sup>, Ting-Shuo Huang <sup>3,4,5</sup>, Yu-Chiau Shyu <sup>3,6,7</sup>, Chau-Ting Yeh <sup>2,4,\*</sup> and Kung-Hao Liang <sup>8,9,10,\*</sup>

**Supplementary Figure S1.** The AUDIT score distribution of screened participants in this community study.

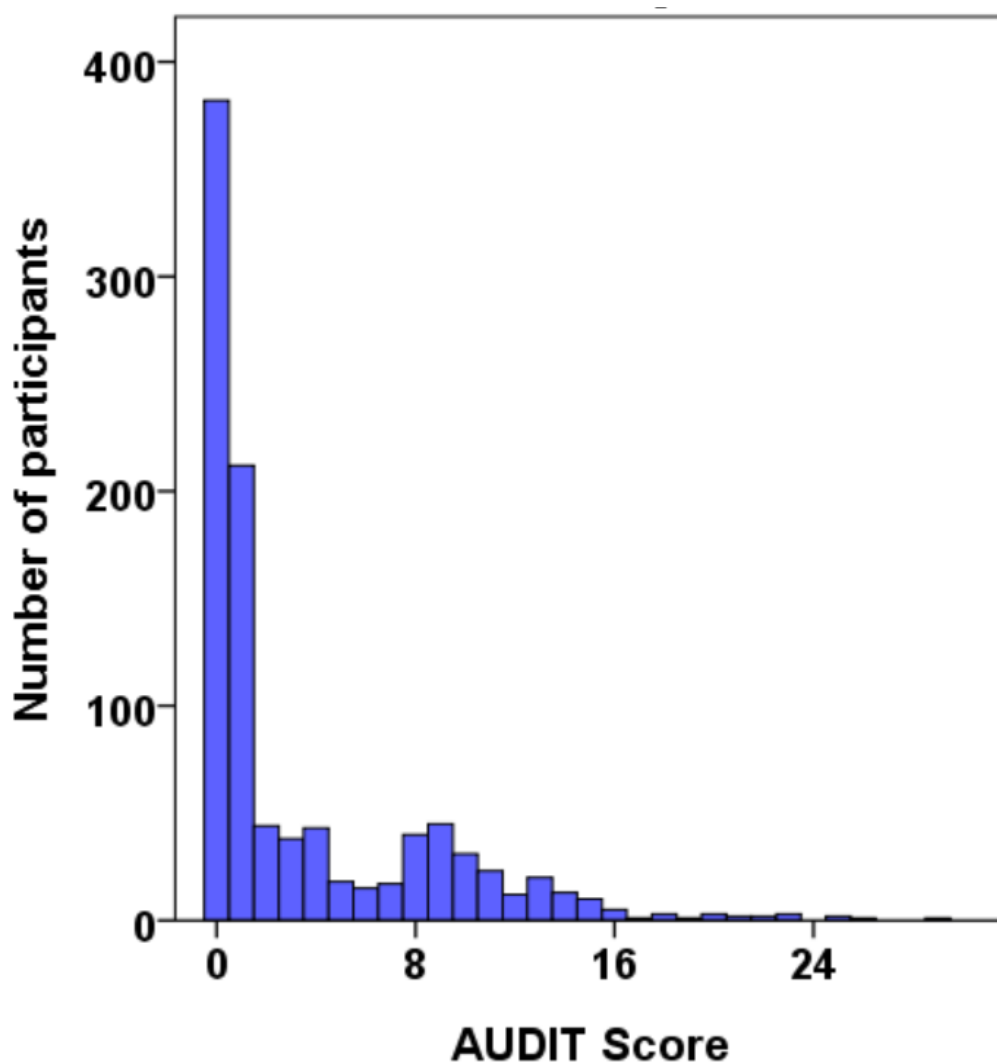

**Supplementary Figure S2.** The algorithm used for exploring the allele carrying haplotypes in a group of people with the homozygous allele.

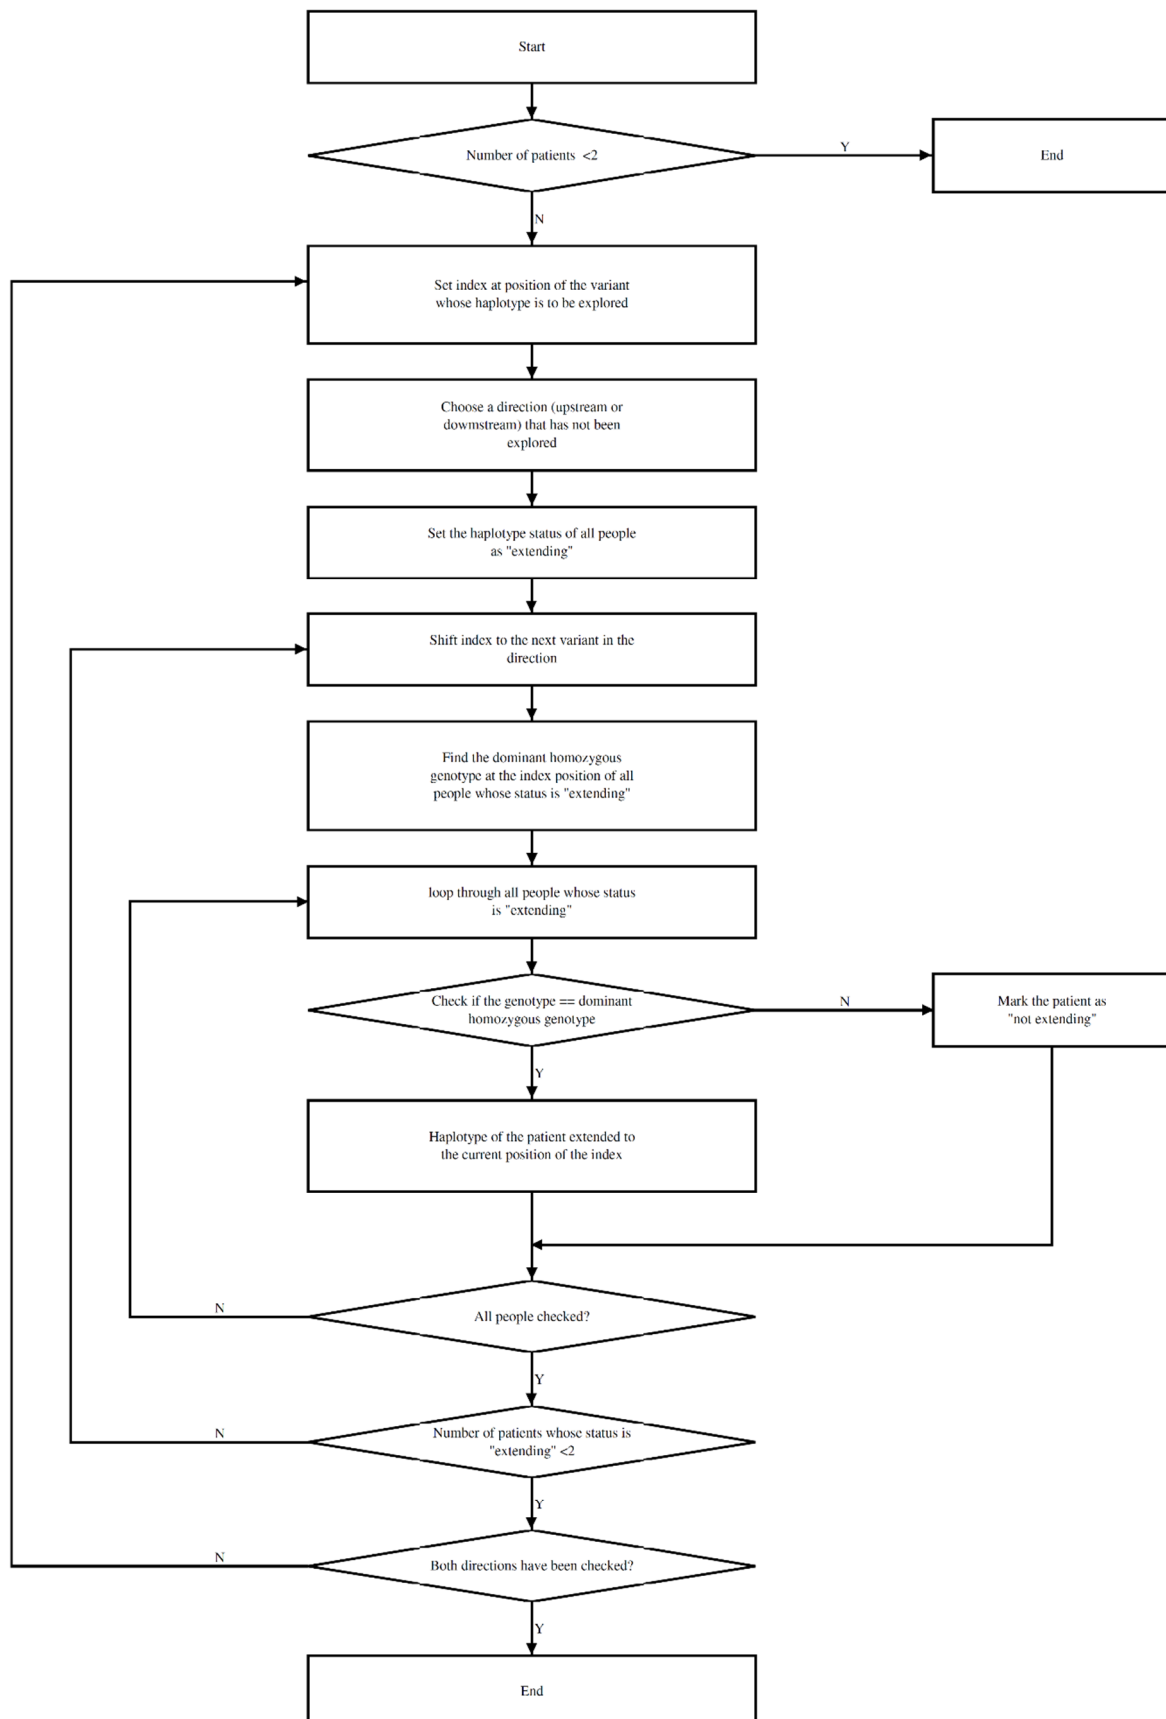

Supplement: s1 [file s1]
